# Supplementary material for: Direct observation of drops on slippery lubricant-infused surfaces
Source: Royal Society of Chemistry journal article supplement (doi:10.1039/c5sm01809a), 2015-01-01
Supplement: c5sm01809a1.pdf [file c5sm01809a1.pdf]

“Direct observation of drops on slippery lubricant-infused surfaces”

by

Frank Schellenberger, Jing Xie, Noemí Encinas, Alexandre Hardy, Markus Klapper, Periklis Papadopoulos, Hans-Jürgen Butt\*, and Doris Vollmer\*.

**Fabrication of SU-8 pillars.** The pillar structures were prepared via photolithography using a SU-8 photoresist (Microchem). Glass slides with a thickness of 170  $\mu\text{m}$  were cleaned with acetone in an ultrasound bath and dried in a vacuum oven (Heraeus) at 170  $^{\circ}\text{C}$ . The SU-8 2025 (or SU-8 2005) photoresist was first mixed with the hydrophobic perylenemonoimide dye (PMI) at a concentration of 0.05 mg/mL<sup>44</sup>. Then, the mixture was spin-coated onto the glass slides. The substrates were then soft baked at 95  $^{\circ}\text{C}$  for 4 min and allowed to slowly cool down for 1 hour. Then they were exposed to UV light (mercury lamp at 350 W) for 35 s (or 30 s) using a Karl-Suss mask aligner and baked at 95  $^{\circ}\text{C}$  for 4 min. The substrates were slowly cooled for 12 h and finally developed with a SU-8 developer (Microchem) and rinsed with 2-propanol. The SU-8 surfaces were treated overnight with 1 M HCl and 0.1 M NaOH at room temperature to hydrolyse the surfaces. Resulting dimensions of the pillars were: center to-center distance 40  $\mu\text{m}$ , diameter 10  $\mu\text{m}$ , and height 10  $\mu\text{m}$ , giving an area fraction of  $f_{\text{SU8}} = 5\%$ . Finally, the surfaces were hydrophobised with (1H,1H,2H,2H)-perfluorooctyl-trichlorosilane via chemical vapor deposition during 3 h, after activation by  $\text{O}_2$  plasma for 0.6 minutes at 150 W. This process increases the density of  $-\text{OH}$  groups which are anchoring points for the fluorosilane. For this purpose, the substrates and an open glass vessel containing 0.1 mL of the volatile silane were placed in a desiccator for 3 hours. The desiccator was evacuated for a few seconds to increase the vapour pressure of the silane. After hydrophobisation, vacuum was applied for one hour to remove unreacted silane residues.

## Interfacial tension.

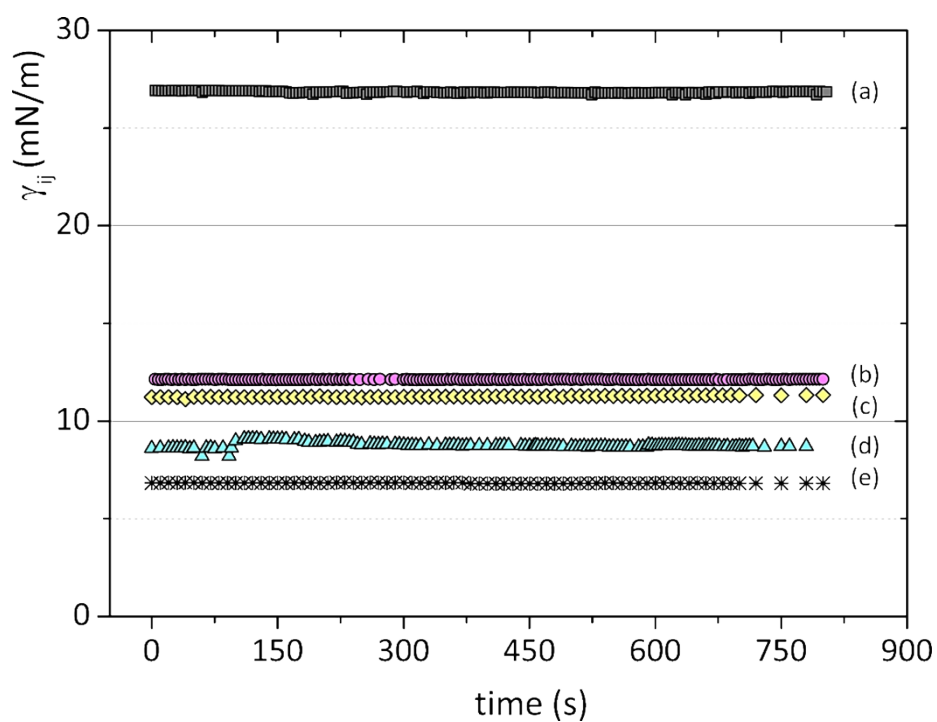

**Figure S1.** Interfacial tension ( $\gamma_{ij}$ ) versus time of a) ethylene glycol-FC70, b) peanut oil-FC70, c) water-ionic liquid, d) water-decanol and e) hexadecane-FC70 systems.

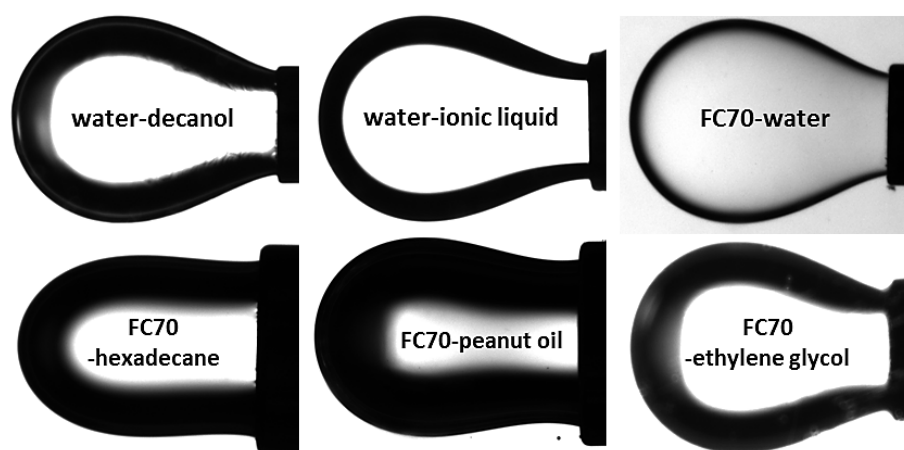

**Figure S2.** Snapshots of liquid drops used to measure the interfacial tension

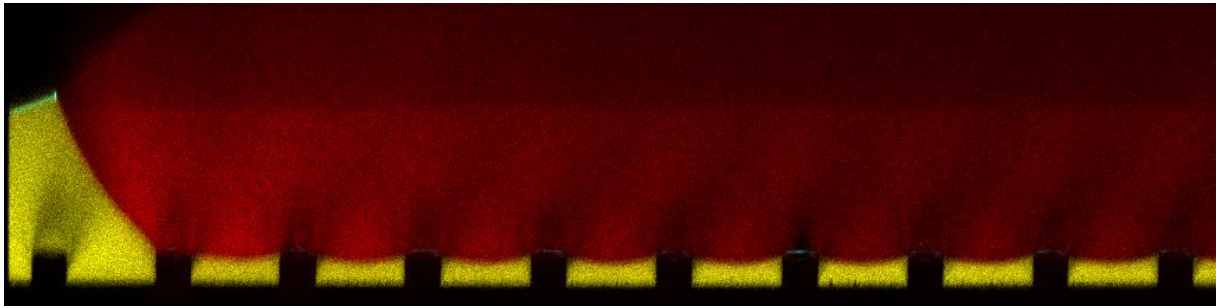

**Video 1:** Evaporation of a water drop placed on a slippery micropillar array. In real time the movie takes 50 s. Red: fluorescently labeled water; yellow: fluorescently labeled decanol. Image size:  $387.5 \times 96.6 \mu\text{m}^2$ .

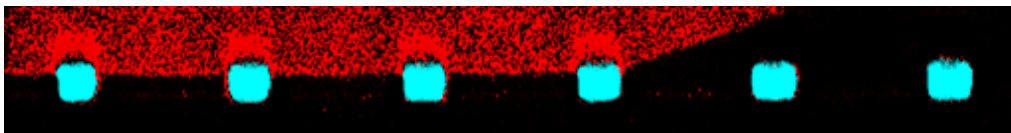

**Video 2:** Time evolution of the receding contact line. Confocal microscopy video monitoring the contact angle of a water drop (red) as it recedes because of evaporation on an FC70-impregnated micropillar array (blue). In real time the movie takes 560 s.

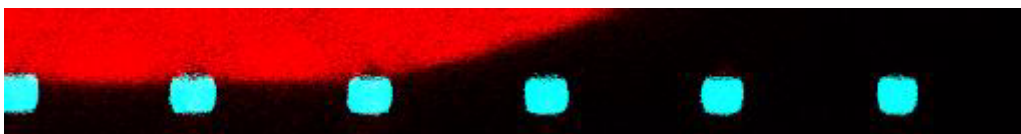

**Video 3:** Time evolution of the advancing contact line. Confocal microscopy video monitoring the advancement of a drop on an FC70-impregnated micropillar array. In real time the movie takes 0.2 s.
